# Supplementary material for: Pharmacokinetics and Safety of Lurbinectedin Administrated with Itraconazole in Cancer Patients: A Drug–Drug Interaction Study
Source: MDPI journal article supplement (doi:10.3390/md22040178), 2024-04-16
Supplement: s1 [file s1]

## SUPPLEMENTARY MATERIAL

**Table S1.** Demographics and baseline characteristics of patients.

|                                                                                | Part A<br>Seq. 1<br>(TR: ITZ + LRB Cycle<br>1)<br>(n = 3) | Part B<br>Seq. 1<br>(TR: ITZ+LRB Cycle 1)<br>(n = 5) | Seq. 2<br>(RT: ITZ+LRB Cycle<br>2)<br>(n = 6) | Total<br>(N = 14)    |
|--------------------------------------------------------------------------------|-----------------------------------------------------------|------------------------------------------------------|-----------------------------------------------|----------------------|
| <b>Gender</b>                                                                  |                                                           |                                                      |                                               |                      |
| Male                                                                           | –                                                         | 3 (60%)                                              | 2 (33%)                                       | 5 (36%)              |
| Female                                                                         | 3 (100%)                                                  | 2 (40%)                                              | 4 (67%)                                       | 9 (64%)              |
| <b>Median age, years (range)</b>                                               | 69 (49–72)                                                | 64 (56–70)                                           | 62 (56–72)                                    | 63 (49–72)           |
| <b>ECOG performance status</b>                                                 |                                                           |                                                      |                                               |                      |
| 0                                                                              | 1 (33%)                                                   | 4 (80%)                                              | 5 (83%)                                       | 10 (71%)             |
| 1                                                                              | 2 (67%)                                                   | 1 (20%)                                              | 1 (17%)                                       | 4 (29%)              |
| <b>Median BSA, m<sup>2</sup> (range)</b>                                       | 1.60 (1.53–1.86)                                          | 1.70 (1.45–2.15)                                     | 1.76 (1.60–2.12)                              | 1.73 (1.45–2.15)     |
| <b>Stage at diagnosis</b>                                                      |                                                           |                                                      |                                               |                      |
| Early                                                                          | 1 (33%)                                                   | 1 (20%)                                              | 2 (33%)                                       | 4 (29%)              |
| Locally advanced                                                               | –                                                         | 1 (20%)                                              | 2 (33%)                                       | 3 (21%)              |
| Metastatic                                                                     | 2 (67%)                                                   | 3 (60%)                                              | 2 (33%)                                       | 7 (50%)              |
| <b>Primary tumors</b>                                                          |                                                           |                                                      |                                               |                      |
| Ovarian carcinoma                                                              | 1 (33%)                                                   | –                                                    | 3 (50%)                                       | 4 (29%)              |
| Lung                                                                           | –                                                         | 1 (20%)                                              | 2 (33%)                                       | 3 (21%) <sup>a</sup> |
| Endometrial carcinoma                                                          | –                                                         | 2 (40%)                                              | –                                             | 2 (14%)              |
| Colon adenocarcinoma                                                           | –                                                         | 1 (20%)                                              | –                                             | 1 (7%)               |
| Epidermoid carcinoma                                                           | –                                                         | 1 (20%)                                              | –                                             | 1 (7%)               |
| Leiomyosarcoma                                                                 | –                                                         | –                                                    | 1 (17%)                                       | 1 (7%)               |
| Mesothelioma                                                                   | 1 (33%)                                                   | –                                                    | –                                             | 1 (7%)               |
| Pancreatobiliary<br>adenocarcinoma                                             | 1 (33%)                                                   | –                                                    | –                                             | 1 (7%)               |
| <b>Number of sites</b>                                                         |                                                           |                                                      |                                               |                      |
| Median (range)                                                                 | 4 (2–4)                                                   | 3 (2–5)                                              | 2 (1–5)                                       | 3 (1–5)              |
| <b>Sites of disease</b>                                                        |                                                           |                                                      |                                               |                      |
| Lung                                                                           | 2 (67%)                                                   | 4 (80%)                                              | 3 (50%)                                       | 9 (64%)              |
| Lymph node                                                                     | 1 (33%)                                                   | 4 (80%)                                              | 4 (67%)                                       | 9 (64%)              |
| Liver                                                                          | 1 (33%)                                                   | 2 (40%)                                              | 1 (17%)                                       | 4 (29%)              |
| Bone                                                                           | 1 (33%)                                                   | 1 (20%)                                              | 1 (17%)                                       | 3 (21%)              |
| Peritoneum                                                                     | 1 (33%)                                                   | 1 (20%)                                              | 1 (17%)                                       | 3 (21%)              |
| Pleura                                                                         | 2 (67%)                                                   | 1 (20%)                                              | –                                             | 3 (21%)              |
| Adrenal                                                                        | –                                                         | 1 (20%)                                              | 1 (17%)                                       | 2 (14%)              |
| CNS                                                                            | –                                                         | 2 (40%)                                              | –                                             | 2 (14%)              |
| Breast                                                                         | –                                                         | –                                                    | 1 (17%)                                       | 1 (7%)               |
| Kidney                                                                         | –                                                         | –                                                    | 1 (17%)                                       | 1 (7%)               |
| Mesenteric lymph node                                                          | 1 (33%)                                                   | –                                                    | –                                             | 1 (7%)               |
| Muscle                                                                         | –                                                         | –                                                    | 1 (17%)                                       | 1 (7%)               |
| Rib                                                                            | 1 (33%)                                                   | –                                                    | –                                             | 1 (7%)               |
| <b>Time from diagnosis to first<br/>infusion (years)</b>                       |                                                           |                                                      |                                               |                      |
| Median (range)                                                                 | 2.6 (1.0–3.4)                                             | 3.4 (2.0–13.8)                                       | 3.5 (2.5–6.8)                                 | 3.4 (1.0–13.8)       |
| <b>Prior treatment for advanced<br/>disease (prior chemotherapy<br/>lines)</b> |                                                           |                                                      |                                               |                      |
| Median (range)                                                                 | 2 (2–4)                                                   | 3 (2–6)                                              | 5 (3–11)                                      | 4 (2–11)             |

Data shown are n (%) of treated patients by study part (Part A: Sequence 1 *versus* Part B: Sequence 1 and Sequence 2) and sequence (Sequence 1 [TR] *versus* Sequence 2 [RT]), except for median (range).

Part A/Sequence 1: ITZ 200 mg, once-daily for 12 days + LRB (0.8 mg/m<sup>2</sup>, 1 h, IV infusion) (C1) followed by C2 and C3 of LRB alone; Part B/Sequence 1: ITZ 200 mg, once-daily for 12 days + LRB (0.9 mg/m<sup>2</sup>, 1 h, IV Infusion) (C1) followed by C2 and C3 of LRB alone; Part B/Sequence 2: LRB alone (3.2 mg/m<sup>2</sup>, 1 h, IV infusion) (C1) followed by ITZ 200 mg, once-daily for 12 days + LRB (0.9 mg/m<sup>2</sup>, 1 h, IV infusion) (C2) and LRB alone (C3). LRB was administered at 3.2 mg/m<sup>2</sup> as a 1 h IV infusion q3wk for all patients when given without ITZ.

---

<sup>a</sup> Lung (n = 3 patients) included: NSCLC (n = 2 patients) and SCLC (n = 1 patient).

BSA, body surface area; CNS, central nervous system; ECOG, Eastern Cooperative Oncology Group; ITZ, itraconazole; LRB, lurbinectedin; NSCLC, non-small cell lung cancer; PS, performance status; q3wk, every three weeks; RT, Reference-Test (ITZ + LRB in Cycle 2); Seq.1, Sequence 1; Seq. 2, Sequence 2; SCLC, small cell lung cancer; TR, Test-Reference (ITZ + LRB in Cycle 1).

**Table S2.** Treatment-emergent adverse events (regardless of relationship) by study part, worst grade per treatment.

| NCI-CTCAE grade                                                                 | Part A             |        |   |                      |        |   | Part B              |        |   |                       |       |   |
|---------------------------------------------------------------------------------|--------------------|--------|---|----------------------|--------|---|---------------------|--------|---|-----------------------|-------|---|
|                                                                                 | ITZ+LRB<br>(n = 3) |        |   | LRB alone<br>(n = 3) |        |   | ITZ+LRB<br>(n = 10) |        |   | LRB alone<br>(n = 11) |       |   |
|                                                                                 | All<br>Grades      | 3      | 4 | All<br>Grades        | 3      | 4 | All Grades          | 3      | 4 | All<br>Grades         | 3     | 4 |
| <b>Gastrointestinal disorder</b>                                                |                    |        |   |                      |        |   |                     |        |   |                       |       |   |
| Nausea                                                                          | —                  | —      | — | —                    | —      | — | 1 (10)              | —      | — | 5 (45)                | —     | — |
| Vomiting                                                                        | —                  | —      | — | 1 (33)               | —      | — | —                   | —      | — | 3 (27)                | 1 (9) | — |
| Diarrhea                                                                        | —                  | —      | — | —                    | —      | — | —                   | —      | — | 1 (9)                 | —     | — |
| Constipation                                                                    | —                  | —      | — | 1 (33)               | —      | — | —                   | —      | — | —                     | —     | — |
| Abdominal pain                                                                  | —                  | —      | — | —                    | —      | — | 1 (10)              | —      | — | —                     | —     | — |
| Intestinal obstruction                                                          | —                  | —      | — | —                    | —      | — | 1 (10)              | 1 (10) | — | —                     | —     | — |
| Intestinal pseudo-obstruction                                                   | —                  | —      | — | —                    | —      | — | —                   | —      | — | 1 (9)                 | —     | — |
| Small intestinal obstruction                                                    | —                  | —      | — | —                    | —      | — | —                   | —      | — | 1 (9)                 | 1 (9) | — |
| Stomatitis                                                                      | —                  | —      | — | —                    | —      | — | —                   | —      | — | 1 (9)                 | —     | — |
| <b>General disorders and administration site conditions</b>                     |                    |        |   |                      |        |   |                     |        |   |                       |       |   |
| Fatigue                                                                         | 1 (33)             | —      | — | 1 (33)               | —      | — | —                   | —      | — | 2 (18)                | —     | — |
| <b>Infections and infestations</b>                                              |                    |        |   |                      |        |   |                     |        |   |                       |       |   |
| Stoma site infection                                                            | —                  | —      | — | —                    | —      | — | 1 (10)              | —      | — | —                     | —     | — |
| <b>Respiratory, thoracic and mediastinal disorders</b>                          |                    |        |   |                      |        |   |                     |        |   |                       |       |   |
| Respiratory failure                                                             | —                  | —      | — | —                    | —      | — | —                   | —      | — | 1 (9)                 | —     | — |
| <b>Metabolism and nutrition disorders</b>                                       |                    |        |   |                      |        |   |                     |        |   |                       |       |   |
| Decreased appetite                                                              | —                  | —      | — | —                    | —      | — | 1 (10)              | —      | — | —                     | —     | — |
| Hypercalcemia                                                                   | —                  | —      | — | —                    | —      | — | 1 (10)              | —      | — | —                     | —     | — |
| <b>Musculoskeletal and connective tissue disorders</b>                          |                    |        |   |                      |        |   |                     |        |   |                       |       |   |
| Bone pain                                                                       | 1 (33)             | —      | — | 1 (33)               | —      | — | —                   | —      | — | —                     | —     | — |
| Back pain                                                                       | —                  | —      | — | —                    | —      | — | 1 (10)              | —      | — | —                     | —     | — |
| Rhabdomyolysis                                                                  | —                  | —      | — | —                    | —      | — | —                   | —      | — | 1 (9)                 | 1 (9) | — |
| <b>Nervous system disorders</b>                                                 |                    |        |   |                      |        |   |                     |        |   |                       |       |   |
| Syncope                                                                         | 1 (33)             | 1 (33) | — | —                    | —      | — | —                   | —      | — | —                     | —     | — |
| Dysgeusia                                                                       | —                  | —      | — | 1 (33)               | —      | — | —                   | —      | — | —                     | —     | — |
| <b>Neoplasms benign, malignant and unspecified (including cysts and polyps)</b> |                    |        |   |                      |        |   |                     |        |   |                       |       |   |
| Tumor pain                                                                      | —                  | —      | — | —                    | —      | — | 1 (10)              | —      | — | —                     | —     | — |
| <b>Renal and urinary disorders</b>                                              |                    |        |   |                      |        |   |                     |        |   |                       |       |   |
| Acute kidney injury                                                             | —                  | —      | — | —                    | —      | — | —                   | —      | — | 1 (9)                 | 1 (9) | — |
| <b>Respiratory, thoracic and mediastinal disorders</b>                          |                    |        |   |                      |        |   |                     |        |   |                       |       |   |
| Cough                                                                           | 1 (33)             | —      | — | —                    | —      | — | —                   | —      | — | —                     | —     | — |
| Dyspnea                                                                         | 1 (33)             | —      | — | —                    | —      | — | —                   | —      | — | —                     | —     | — |
| Pleural effusion                                                                | 1 (33)             | —      | — | 1 (33)               | 1 (33) | — | —                   | —      | — | —                     | —     | — |
| <b>Vascular disorders</b>                                                       |                    |        |   |                      |        |   |                     |        |   |                       |       |   |
| Deep vein thrombosis                                                            | —                  | —      | — | —                    | —      | — | —                   | —      | — | 1 (9)                 | 1 (9) | — |

Values are n (%) of patients.

ITZ, itraconazole; LRB, lurbinectedin; NCI-CTCAE, National Cancer Institute Common Terminology Criteria for Adverse Events.
